# Supplementary material
Source: PubMed Central journal article supplement (PMC2736448)
Supplement: 0902801106_0902801106SI.pdf [file 0902801106_0902801106SI.pdf]

# Supporting Information

Komori et al. 10.1073/pnas.0902801106

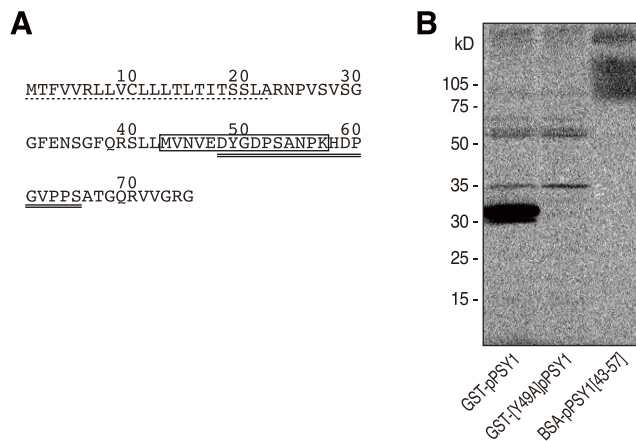

**Fig. S1.** Detection of *Arabidopsis* tyrosylprotein sulfotransferase (AtTPST) activity by using PSY1 precursor polypeptide as a substrate. (A) Sequence of PSY1 precursor polypeptide (pPSY1). The putative signal peptide is underlined with a dashed line, and the mature PSY1 domain is double underlined. A 15-aa region sufficient for tyrosine sulfation (acidic motif peptide) is boxed. (B) Detection of AtTPST activity. GST-pPSY1, GST-[Y49A]pPSY1, or BSA-pPSY1[43-57] was incubated with [<sup>35</sup>S]PAPS in the presence of solubilized *Arabidopsis* microsomal fractions and analyzed by SDS/PAGE followed by autoradiography. GST-pPSY1 migrates at 32 kDa, and BSA-pPSY1[43-57] migrates at ≈100 kDa on SDS/PAGE.
